# Supplementary material for: Cooperative photocatalytic selective aerobic oxidation of alcohols on anatase TiO2
Source: Royal Society of Chemistry journal article supplement (doi:10.1039/c9se00100j), 2019-01-01
Supplement: c9se00100j1.pdf [file c9se00100j1.pdf]

## Supporting information

# Cooperative Photocatalytic Selective Aerobic Oxidation of Alcohols on Anatase TiO<sub>2</sub>

Ningning Wang <sup>a,b</sup>, Ji-Long Shi <sup>a</sup>, Huimin Hao <sup>a</sup>, Hong Yuan <sup>\*b</sup>, and Xianjun Lang <sup>\*a,b</sup>

<sup>a</sup> *Sauvage Center for Molecular Sciences, College of Chemistry and Molecular Sciences, Wuhan University, Wuhan 430072, China.*

<sup>b</sup> *Key Laboratory of Pesticide and Chemical Biology of Ministry of Education, College of Chemistry, Central China Normal University, Wuhan 430079, China.*

\* To whom correspondence should be addressed. E-mail address:

[yuanhong@mail.ccnu.edu.cn](mailto:yuanhong@mail.ccnu.edu.cn) (H. Yuan); [xianjunlang@whu.edu.cn](mailto:xianjunlang@whu.edu.cn) (X. J. Lang).

## Table of contents

|                                                                                                                                                                                                                                                      |    |
|------------------------------------------------------------------------------------------------------------------------------------------------------------------------------------------------------------------------------------------------------|----|
| <b>Instrumentations and conditions</b> .....                                                                                                                                                                                                         | S2 |
| XRD .....                                                                                                                                                                                                                                            | S2 |
| UV-vis .....                                                                                                                                                                                                                                         | S2 |
| HR-TEM .....                                                                                                                                                                                                                                         | S2 |
| BET .....                                                                                                                                                                                                                                            | S2 |
| EPR .....                                                                                                                                                                                                                                            | S3 |
| GC .....                                                                                                                                                                                                                                             | S3 |
| Light source .....                                                                                                                                                                                                                                   | S4 |
| <b>Figure S1.</b> The XRD patterns of anatase TiO <sub>2</sub> and 5(6)-FAM-sensitized TiO <sub>2</sub> .....                                                                                                                                        | S5 |
| <b>Figure S2.</b> The TEM and HR-TEM images of anatase TiO <sub>2</sub> [(a), (b)] and 5(6)-FAM-sensitized TiO <sub>2</sub> [(c), (d)] .....                                                                                                         | S6 |
| <b>Figure S3.</b> Fluorescence decay of the 5(6)-FAM and 5(6)-FAM-sensitized TiO <sub>2</sub> .....                                                                                                                                                  | S6 |
| <b>Figure S4.</b> The TEM images of the recycled 5(6)-FAM-sensitized TiO <sub>2</sub> [(a), (b)] .....                                                                                                                                               | S7 |
| <b>Figure S5.</b> The XRD of the recycled 5(6)-FAM-sensitized TiO <sub>2</sub> .....                                                                                                                                                                 | S7 |
| <b>Table S1.</b> The influence of different LEDs on the selective aerobic oxidation of benzyl alcohol under visible light irradiation <sup>[a]</sup> .....                                                                                           | S7 |
| <b>Table S2.</b> The influence of the solvent on the selective aerobic oxidation of benzyl alcohol by the visible light photocatalysis of 5(6)-FAM-sensitized TiO <sub>2</sub> and CH <sub>3</sub> O-TEMPO <sup>[a]</sup> .....                      | S8 |
| <b>Table S3.</b> The influence of the amount of CH <sub>3</sub> CN on the selective aerobic oxidation of benzyl alcohol by the visible light photocatalysis of 5(6)-FAM-sensitized TiO <sub>2</sub> and CH <sub>3</sub> O-TEMPO <sup>[a]</sup> ..... | S9 |

## **Instrumentations and conditions**

### **XRD**

The X-ray diffraction (XRD) was performed to identify the phase nature of the 5(6)-FAM-sensitized TiO<sub>2</sub> photocatalyst and the anatase TiO<sub>2</sub> samples using a Rigaku Miniflex 600 diffractometer with Cu K $\alpha$  radiation scanned from 10-80°.

### **UV-vis**

The UV-visible absorption spectra of all 5(6)-FAM-sensitized TiO<sub>2</sub> and TiO<sub>2</sub> samples in this paper were collected on a UV-visible spectrophotometer (Shimadzu UV 3600) equipped with a diffuse reflectance measurement accessory.

### **HR-TEM**

The TEM images of TiO<sub>2</sub> and 5(6)-FAM-sensitized TiO<sub>2</sub> samples were recorded on a JEOL JEM2012—FEF high resolution transmission electron microscope (HR-TEM) operating at 200 kV to obtain the detailed structure information.

### **BET**

The specific surface areas were determined by N<sub>2</sub> physisorption by using an ASAP automated system and the Brunauer-Emmet-Teller (BET) method. Each sample was degassed under vacuum(<1×10<sup>-5</sup> bar) in the Micromertics system at

120°C for 12 h prior to N<sub>2</sub> physisorption.

## **EPR**

The EPR experiments were carried out on an electron spin resonance (EPR) spectrometer (JEOL, JES-FA200). 0.2 mmol of benzyl alcohol, 50.5 mg of 5(6)-FAM-sensitized TiO<sub>2</sub> were dispersed in the 5 mL of acetonitrile to get the mixture solution. Subsequently, the EPR signal of DMPO-·OOH, collected at 0 min, 2 min and 4 min respectively, were tested under room temperature after the certain amount of mixture and equal quantity of DMPO was added to the EPR tube. The light irradiation source was a high-pressure Hg lamp with a filter to select the band of 520 nm which is the same as the photo-catalytic reaction. And then 0.004 mmol of CH<sub>3</sub>O-TEMPO were mixed to the same EPR tube and collected the EPR signals in situ at 0 min, 2 min and 4 min under the same light irradiation. Finally, the signal was collected after the light irradiation was removed. The EPR signal of conduction band electron was tested by the spectrometer equipped with the same light source at 520 nm.

## **GC**

To measure the conversions of substrates and selectivities of products quantitatively at the same time, gas chromatograph (Agilent 7890B) equipped with a flame ionization detector (FID) was applied in this research which used high pure N<sub>2</sub> as the carrier gas. The standard analysis conditions of GC-FID: injector temperature 250 °C; detector temperature 280 °C; column temperature

program: 50 °C (hold 1 min) raised up to 280 °C (hold 2 min) at a rate of 20 °C/min. The samples were injected into GC-FID with an autoinjector which can warrant the accuracy of the analysis by excluding the uncontrollable factors during manual injection. The results were all obtained using a split mode with a split ratio of 30:1. An Agilent J&W DB-5 capillary column (30 m × 0.32 mm × 0.25 μm, 19,091 J-413) was selected as the column unless otherwise stated; an Agilent J&W DB-17 capillary column (30 m × 0.32 mm × 0.25 μm, 123-1732) was used for the quantitative analysis of the products for some other substrates, including entries 4 and 8 of Table 5.

Gas chromatography–mass spectrometry (GC–MS) analysis was performed on a Shimadzu GC 2010 gas chromatograph equipped with a Shimadzu GCMS-QP2010 Ultra electron ionization mass spectrometer using a Restek (Rxi®-5Sil MS) capillary column (30 m × 0.25 mm × 0.25 μm) with high pure He as the carrier gas.

### **Light source**

The reaction was generally irradiated with green LEDs, which were obtained from Shenzhen Qilai Optoelectronics Science and Technology Co., LTD., China. In detail, four LED lamps were fastened around a magnetic stirrer in a circle in which the light irradiation was centered on the 10 mL Pyrex vessel. For green LEDs, the irradiating wavelength range is  $520 \pm 10$  nm. Thus, the possible heating of the reaction medium by infrared light and possible leaking of UV light are completely

excluded.

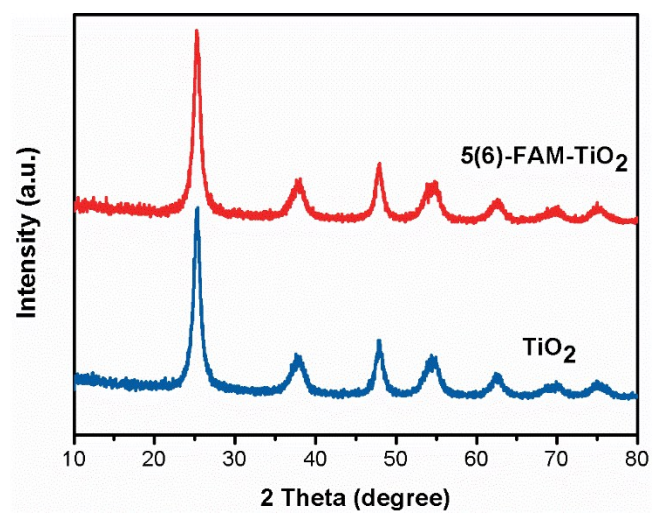

**Figure S1.** The XRD patterns of anatase TiO<sub>2</sub> and 5(6)-FAM-sensitized TiO<sub>2</sub>

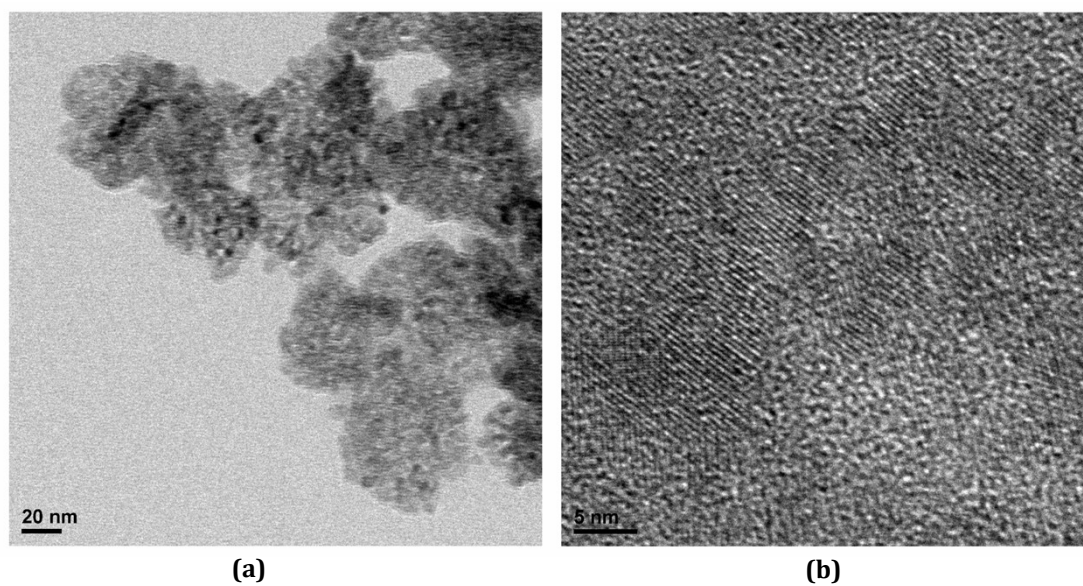

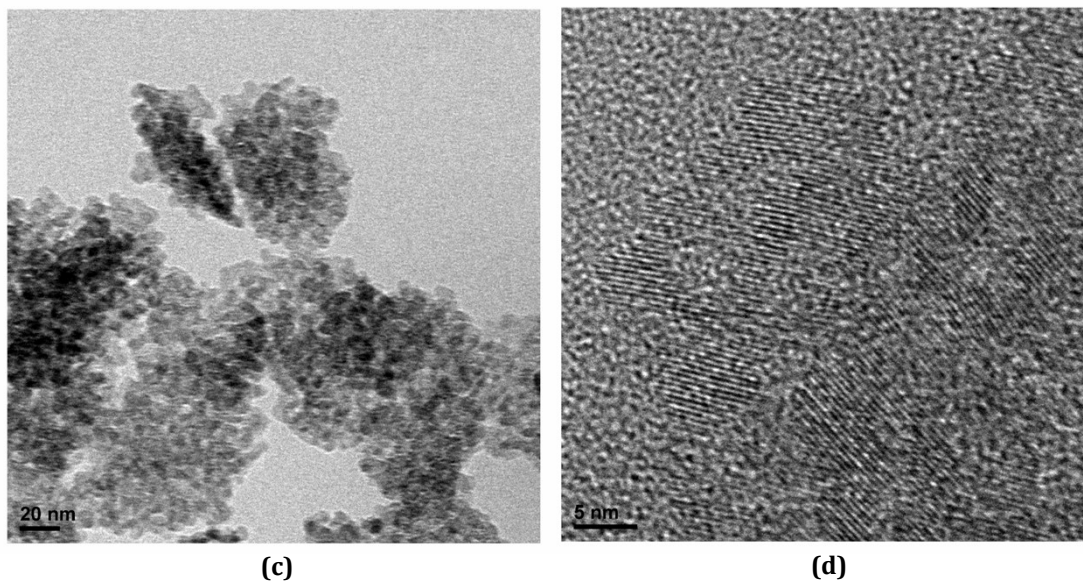

**Figure S2.** The TEM and HR-TEM images of anatase TiO<sub>2</sub> [(a), (b)] and 5(6)-FAM-sensitized TiO<sub>2</sub> [(c), (d)]

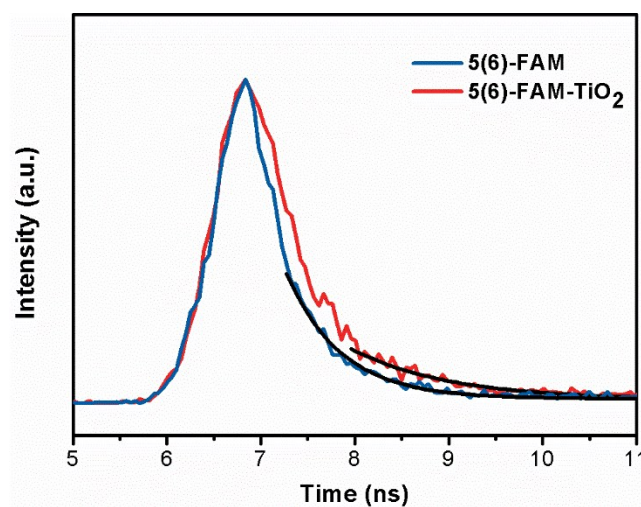

**Figure S3.** Fluorescence decay of the 5(6)-FAM and 5(6)-FAM-sensitized TiO<sub>2</sub>.



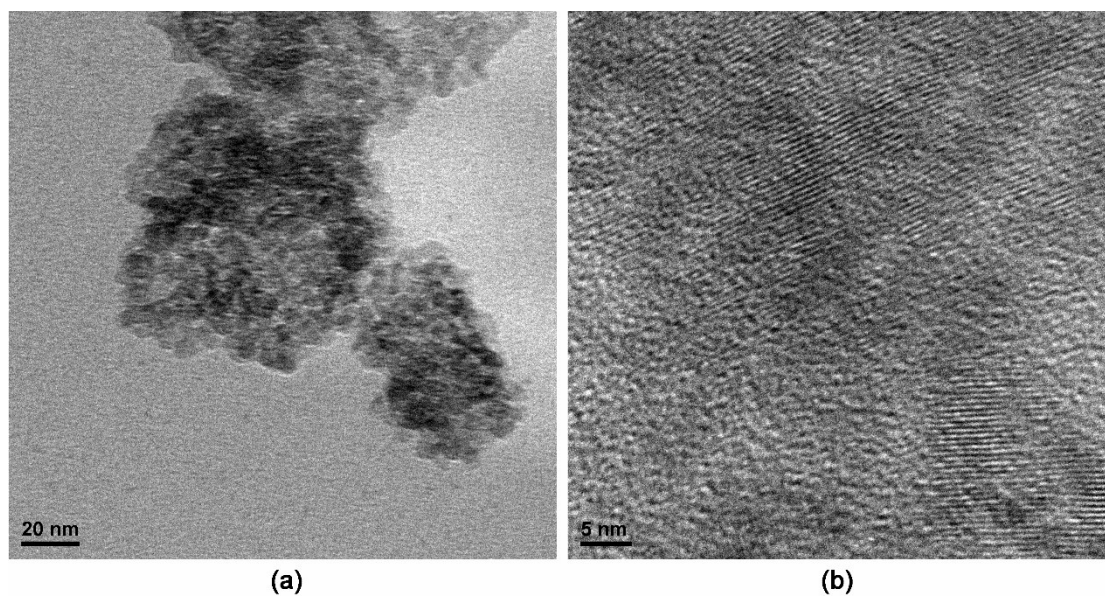

**Figure S4.** The TEM images of the recycled 5(6)-FAM-sensitized  $\text{TiO}_2$  [(a), (b)]

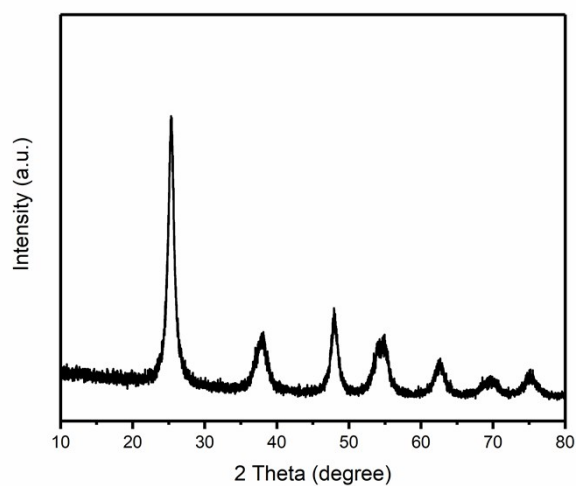

**Figure S5.** The XRD of the recycled 5(6)-FAM-sensitized  $\text{TiO}_2$

**Table S1.** The influence of different LEDs on the selective aerobic oxidation benzyl alcohol under visible light irradiation <sup>[a]</sup>

| Entry | LED    | $\lambda_{\text{max}}$ (nm) | Conv.(%) <sup>[b]</sup> | Sel.(%) <sup>[b]</sup> |
|-------|--------|-----------------------------|-------------------------|------------------------|
| 1     | Red    | 630                         | 6                       | 98                     |
| 2     | Yellow | 590                         | 41                      | 98                     |



|   |        |            |    |    |
|---|--------|------------|----|----|
| 3 | Green  | 520        | 81 | 98 |
| 4 | Blue   | 460        | 80 | 98 |
| 5 | Violet | 400        | 78 | 98 |
| 6 | White  | Continuous | 54 | 98 |

[a] Reaction conditions: benzyl alcohol (0.2 mmol), 5(6)-FAM-sensitized TiO<sub>2</sub> (50.5 mg, including  $1.33 \times 10^{-3}$  mmol of 5(6)-FAM), CH<sub>3</sub>O-TEMPO (0.004 mmol), O<sub>2</sub> (0.1 MPa), green LED irradiation (3 W × 4), CH<sub>3</sub>CN (5 mL), 40 min. [b] Determined by GC-FID using chlorobenzene as the internal standard, conversion of benzyl alcohol, and selectivity of benzaldehyde.

**Table S2.** The influence of the solvent on the selective aerobic oxidation of benzyl alcohol by the visible light photocatalysis of 5(6)-FAM-sensitized TiO<sub>2</sub> and CH<sub>3</sub>O-TEMPO [a]

| Entry | Solvent            | Conv.(%) <sup>[b]</sup> | Sel.(%) <sup>[b]</sup> |
|-------|--------------------|-------------------------|------------------------|
| 1     | CH <sub>3</sub> CN | 86                      | 98                     |
| 2     | BTF <sup>[c]</sup> | 41                      | 98                     |
| 3     | EtOAc              | 37                      | 98                     |
| 4     | PhMe               | 45                      | 98                     |
| 5     | DCM                | 39                      | 98                     |
| 6     | DMF                | 26                      | 98                     |

[a] Reaction conditions: benzyl alcohol (0.2 mmol), 5(6)-FAM-sensitized TiO<sub>2</sub> (50.5 mg, including  $1.33 \times 10^{-3}$  mmol of 5(6)-FAM), CH<sub>3</sub>O-TEMPO (0.004 mmol), O<sub>2</sub> (0.1 MPa), green LED irradiation (3 W × 4), solvent (5 mL), 1 h. [b] Determined by GC-FID using

chlorobenzene as the internal standard, conversion of benzyl alcohol, and selectivity of benzaldehyde. [c] Using biphenyl as the internal standard. BTF, benzonitrile; EtOAc, ethyl acetate; PhMe, toluene; DCM, dichloromethane; DMF, *N,N'*-dimethylformamide.

**Table S3.** The influence of the amount of CH<sub>3</sub>CN on the selective aerobic oxidation of benzyl alcohol by the visible light photocatalysis of 5(6)-FAM-sensitized TiO<sub>2</sub> and CH<sub>3</sub>O-TEMPO [a]

| Entry | CH <sub>3</sub> CN (mL) | C <sub>0</sub> (M) | Conv.(%) <sup>[b]</sup> | Sel.(%) <sup>[b]</sup> |
|-------|-------------------------|--------------------|-------------------------|------------------------|
| 1     | 1                       | 0.200              | 68                      | 98                     |
| 2     | 2                       | 0.100              | 69                      | 98                     |
| 3     | 3                       | 0.067              | 77                      | 98                     |
| 4     | 4                       | 0.050              | 79                      | 98                     |
| 5     | 5                       | 0.020              | 86                      | 98                     |

[a] Reaction conditions: benzyl alcohol (0.2 mmol), 5(6)-FAM-sensitized TiO<sub>2</sub> (50.5 mg, including 1.33×10<sup>-3</sup> mmol of 5(6)-FAM), CH<sub>3</sub>O-TEMPO (0.004 mmol), O<sub>2</sub> (0.1 MPa), green LED irradiation (3 W × 4), CH<sub>3</sub>CN, 1 h. [b] Determined by GC-FID using chlorobenzene as the internal standard, conversion of benzyl alcohol, and selectivity of benzaldehyde.
